# Supplementary material for: APEX1 Polymorphisms and Neuroblastoma Risk in Chinese Children: A Three-Center Case-Control Study
Source: PubMed Central journal article supplement (PMC6614964; doi:10.1155/2019/5736175), 2019-06-25
Supplement: 5736175.f1.pdf [file 5736175.f1.pdf]

**Supplemental Table 1.** Frequency distribution of selected characteristics in cases and controls

| Variables              | Cases (n=469) |       | Controls (n=998) |       | <i>P</i> <sup>a</sup> |
|------------------------|---------------|-------|------------------|-------|-----------------------|
|                        | No.           | %     | No.              | %     |                       |
| Age range, month       | 0.00-132.00   |       | 0.03-156.00      |       | 0.263                 |
| Mean ± SD              | 34.07±27.60   |       | 32.89±27.43      |       |                       |
| ≤18                    | 169           | 36.03 | 390              | 39.08 |                       |
| >18                    | 300           | 63.97 | 608              | 60.92 |                       |
| Gender                 |               |       |                  |       | 0.911                 |
| Female                 | 196           | 41.79 | 414              | 41.48 |                       |
| Male                   | 273           | 58.21 | 584              | 58.52 |                       |
| INSS stages            |               |       |                  |       |                       |
| I                      | 133           | 28.42 | /                | /     |                       |
| II                     | 100           | 21.37 | /                | /     |                       |
| III                    | 69            | 14.74 | /                | /     |                       |
| IV                     | 147           | 31.41 | /                | /     |                       |
| 4s                     | 11            | 2.35  | /                | /     |                       |
| NA                     | 8             | 1.71  | /                | /     |                       |
| Sites of origin        |               |       |                  |       |                       |
| Adrenal gland          | 162           | 34.54 | /                | /     |                       |
| Retroperitoneal region | 138           | 29.42 | /                | /     |                       |
| Mediastinum            | 121           | 25.80 | /                | /     |                       |
| Other region           | 40            | 8.53  | /                | /     |                       |
| NA                     | 8             | 1.71  | /                | /     |                       |

SD, standard deviation; NA, not available.

<sup>a</sup> Two-sided  $\chi^2$  test for distributions between neuroblastoma cases and cancer-free controls.

**Supplemental Table 2.** Association between *APEXI* gene polymorphisms and neuroblastoma risk (Divided subjects)

| Genotype                                             | Guangdong province |                     |                           |                | Henan province   |                                  |                           |                | Shaanxi province |                     |                           |                |
|------------------------------------------------------|--------------------|---------------------|---------------------------|----------------|------------------|----------------------------------|---------------------------|----------------|------------------|---------------------|---------------------------|----------------|
|                                                      | Cases<br>(N=275)   | Controls<br>(N=531) | AOR (95% CI) <sup>a</sup> | P <sup>a</sup> | Cases<br>(N=118) | Controls<br>(N=281) <sup>b</sup> | AOR (95% CI) <sup>a</sup> | P <sup>a</sup> | Cases<br>(N=76)  | Controls<br>(N=186) | AOR (95% CI) <sup>a</sup> | P <sup>a</sup> |
| rs1130409 T>G                                        |                    |                     |                           |                |                  |                                  |                           |                |                  |                     |                           |                |
| TT                                                   | 108 (39.27)        | 210 (39.55)         | 1.00                      |                | 37 (31.36)       | 77 (27.50)                       | 1.00                      |                | 30 (39.47)       | 53 (28.49)          | 1.00                      |                |
| TG                                                   | 129 (46.91)        | 227 (42.75)         | 1.10 (0.80-1.51)          | 0.547          | 56 (47.46)       | 152 (54.29)                      | 0.77 (0.46-1.26)          | 0.296          | 31 (40.79)       | 88 (47.31)          | 0.62 (0.34-1.15)          | 0.129          |
| GG                                                   | 38 (13.82)         | 94 (17.70)          | 0.78 (0.50-1.22)          | 0.282          | 25 (21.19)       | 51 (18.21)                       | 0.97 (0.52-1.81)          | 0.912          | 15 (19.74)       | 45 (24.19)          | 0.59 (0.28-1.22)          | 0.154          |
| Additive                                             |                    |                     | 0.93 (0.76-1.14)          | 0.486          |                  |                                  | 0.96 (0.70-1.31)          | 0.779          |                  |                     | 0.75 (0.52-1.08)          | 0.120          |
| Dominant                                             | 167 (60.73)        | 321 (60.45)         | 1.01 (0.75-1.36)          | 0.952          | 81 (68.64)       | 203 (72.50)                      | 0.82 (0.51-1.31)          | 0.401          | 46 (60.53)       | 133 (71.51)         | 0.61 (0.35-1.07)          | 0.085          |
| Recessive                                            | 237 (86.18)        | 437 (82.30)         | 0.74 (0.50-1.12)          | 0.157          | 93 (78.81)       | 229 (81.79)                      | 1.14 (0.66-1.97)          | 0.633          | 61 (80.26)       | 141 (75.81)         | 0.76 (0.40-1.47)          | 0.420          |
| rs1760944 T>G                                        |                    |                     |                           |                |                  |                                  |                           |                |                  |                     |                           |                |
| TT                                                   | 101 (36.73)        | 186 (35.03)         | 1.00                      |                | 34 (28.81)       | 93 (33.21)                       | 1.00                      |                | 20 (26.32)       | 55 (29.57)          | 1.00                      |                |
| TG                                                   | 128 (46.55)        | 245 (46.14)         | 0.96 (0.70-1.33)          | 0.816          | 62 (52.54)       | 125 (44.64)                      | 1.38 (0.84-2.27)          | 0.210          | 40 (52.63)       | 100 (53.76)         | 1.11 (0.59-2.09)          | 0.748          |
| GG                                                   | 46 (16.73)         | 100 (18.83)         | 0.85 (0.56-1.31)          | 0.462          | 22 (18.64)       | 62 (22.14)                       | 0.99 (0.53-1.85)          | 0.970          | 16 (21.05)       | 31 (16.67)          | 1.43 (0.65-3.15)          | 0.380          |
| Additive                                             |                    |                     | 0.93 (0.76-1.14)          | 0.489          |                  |                                  | 1.03 (0.76-1.39)          | 0.863          |                  |                     | 1.19 (0.80-1.76)          | 0.398          |
| Dominant                                             | 174 (63.27)        | 345 (64.97)         | 0.93 (0.69-1.26)          | 0.642          | 84 (71.19)       | 187 (66.79)                      | 1.25 (0.78-2.00)          | 0.358          | 56 (73.68)       | 131 (70.43)         | 1.19 (0.65-2.16)          | 0.581          |
| Recessive                                            | 229 (83.27)        | 431 (81.17)         | 0.87 (0.59-1.28)          | 0.482          | 96 (81.36)       | 218 (77.86)                      | 0.81 (0.47-1.40)          | 0.456          | 60 (78.95)       | 155 (83.33)         | 1.33 (0.68-2.61)          | 0.404          |
| rs3136817 T>C                                        |                    |                     |                           |                |                  |                                  |                           |                |                  |                     |                           |                |
| TT                                                   | 232 (84.36)        | 443 (83.43)         | 1.00                      |                | 97 (82.20)       | 230 (82.14)                      | 1.00                      |                | 67 (88.16)       | 142 (76.34)         | 1.00                      |                |
| TC                                                   | 40 (14.55)         | 85 (16.01)          | 0.90 (0.60-1.35)          | 0.600          | 18 (15.25)       | 47 (16.79)                       | 0.90 (0.50-1.63)          | 0.729          | 9 (11.84)        | 40 (21.51)          | 0.48 (0.22-1.05)          | 0.065          |
| CC                                                   | 3 (1.09)           | 3 (0.56)            | 1.87 (0.37-9.34)          | 0.448          | 3 (2.54)         | 3 (1.07)                         | 2.33 (0.46-11.78)         | 0.308          | 0 (0.00)         | 4 (2.15)            | /                         | /              |
| Additive                                             |                    |                     | 0.97 (0.67-1.41)          | 0.872          |                  |                                  | 1.07 (0.65-1.75)          | 0.792          |                  |                     | 0.43 (0.21-0.91)          | 0.026          |
| Dominant                                             | 43 (15.64)         | 88 (16.57)          | 0.93 (0.62-1.38)          | 0.720          | 21 (17.80)       | 50 (17.86)                       | 0.99 (0.56-1.74)          | 0.962          | 9 (11.84)        | 44 (23.66)          | 0.44 (0.20-0.94)          | 0.035          |
| Recessive                                            | 272 (98.91)        | 528 (99.44)         | 1.90 (0.38-9.49)          | 0.436          | 115 (97.46)      | 277 (98.93)                      | 2.37 (0.47-11.96)         | 0.297          | 76 (100.00)      | 182 (97.85)         | /                         | /              |
| Combined effect of protective genotypes <sup>c</sup> |                    |                     |                           |                |                  |                                  |                           |                |                  |                     |                           |                |
| 0                                                    | 184 (66.91)        | 337 (63.47)         | 1.00                      |                | 75 (63.56)       | 160 (57.14)                      | 1.00                      |                | 46 (60.53)       | 101 (54.30)         | 1.00                      |                |
| 1-3                                                  | 91 (33.09)         | 194 (36.53)         | 0.87 (0.64-1.18)          | 0.358          | 43 (36.44)       | 120 (42.86)                      | 0.75 (0.48-1.17)          | 0.203          | 30 (39.47)       | 85 (45.70)          | 0.78 (0.45-1.33)          | 0.357          |

AOR, adjusted odds ratio; CI, confidence interval.

<sup>a</sup> Adjusted for age and gender.<sup>b</sup> One was failed in genotyping.<sup>c</sup> Protective genotypes were rs1130409 GG, rs1760944 GG and rs3136817 TC/TT derived from combined subjects.

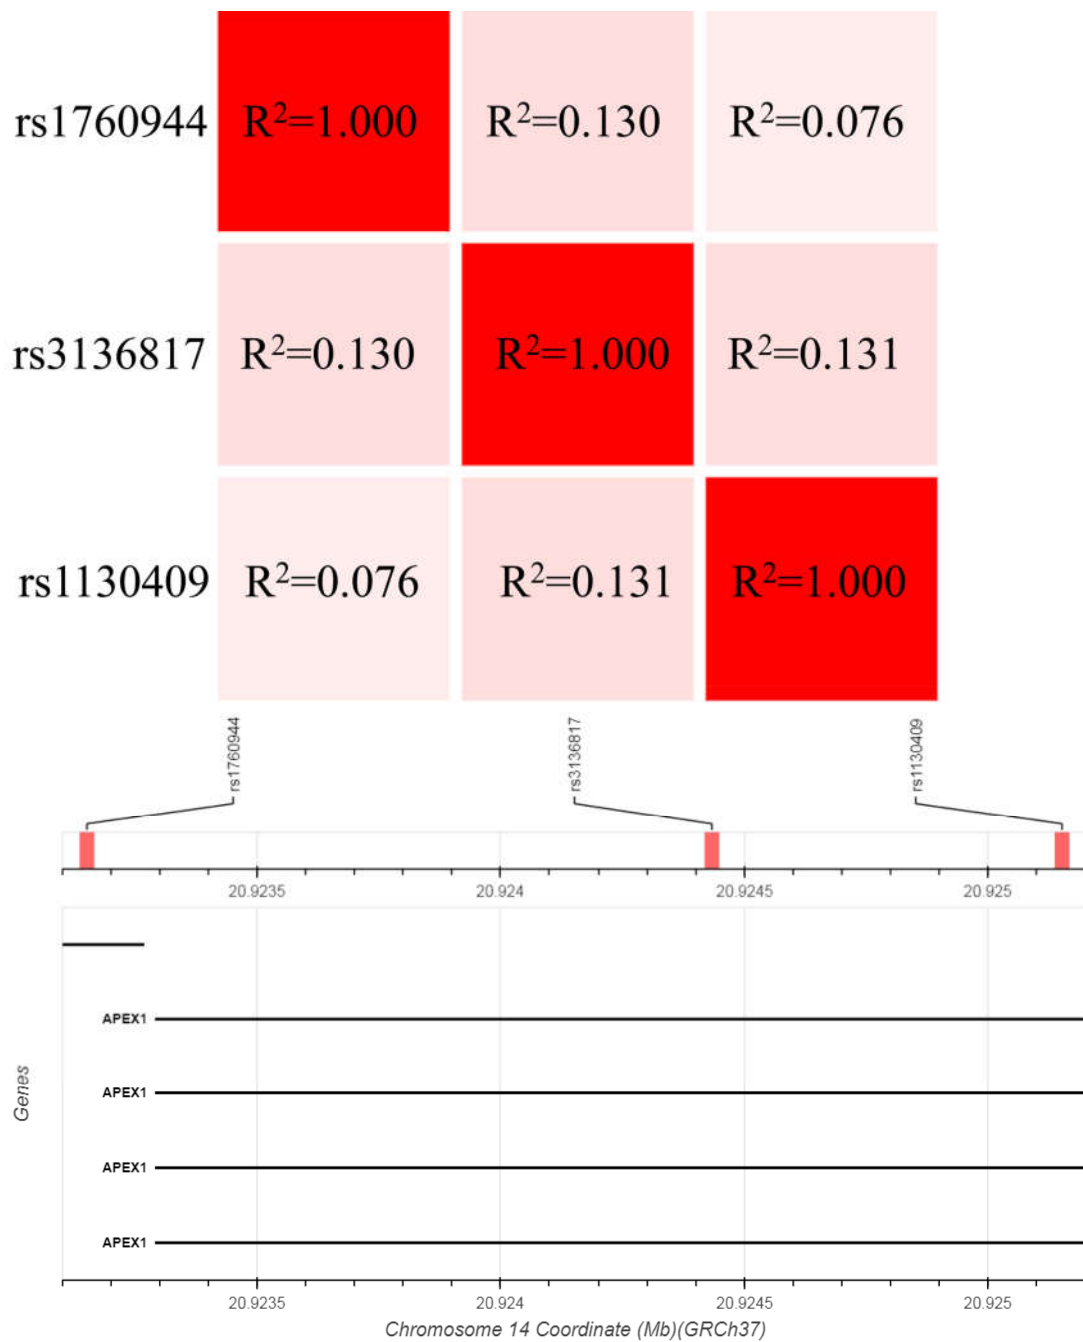

**Supplemental Figure 1.** Linkage disequilibrium analysis for the three selected polymorphisms in *APEX1* gene in Han Chinese population consisting of CHS (Southern Han Chinese) and CHB (Han Chinese in Beijing, China) subjects using data from LDlink online software (<https://ldlink.nci.nih.gov/?tab=ldmatrix>).
